# Supplementary material for: Vitamin C Intake is Inversely Associated with Cardiovascular Mortality in a Cohort of Spanish Graduates: The SUN Project
Source: PubMed Central journal article supplement (PMC5622714; doi:10.3390/nu9090954), 2017-08-29

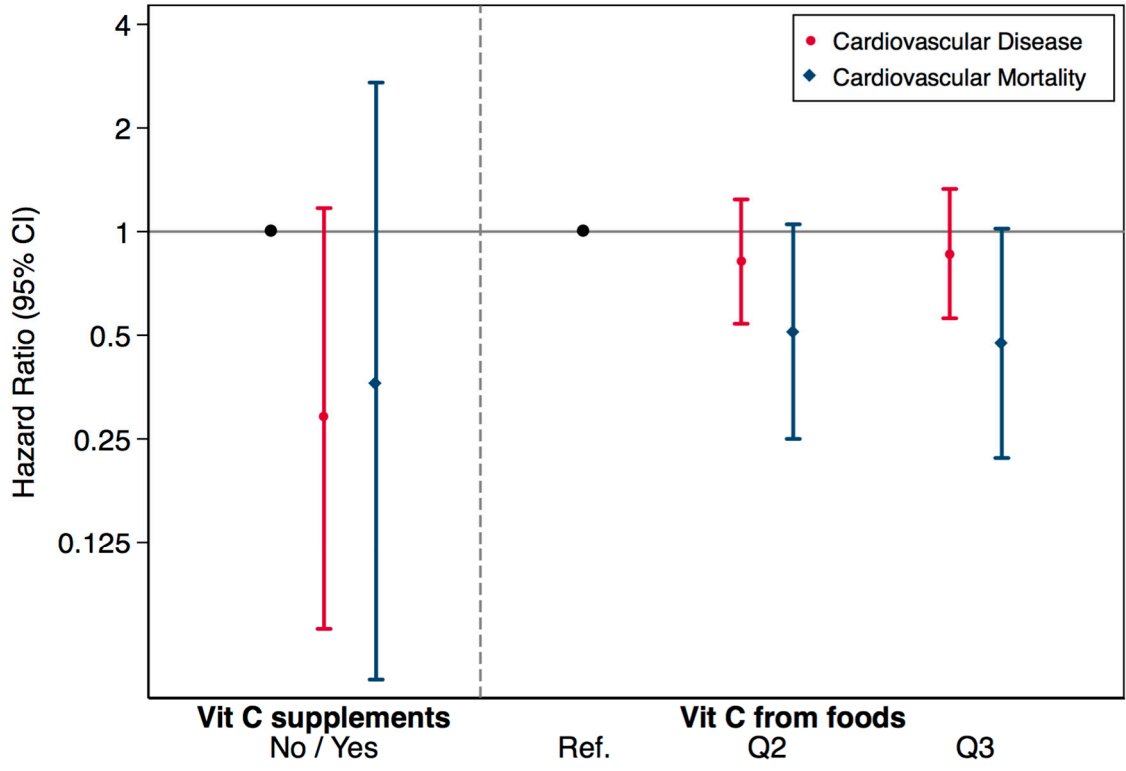

Supplement: nutrients-09-00954-s001.pdf [file nutrients-09-00954-s001.pdf]
